# Supplementary material
Source: Springer Nature journal article supplement (https://www.springermedizin.de/resource/supplementary/13099_2013_122_MOESM2_ESM.pdf/9665596)

**A**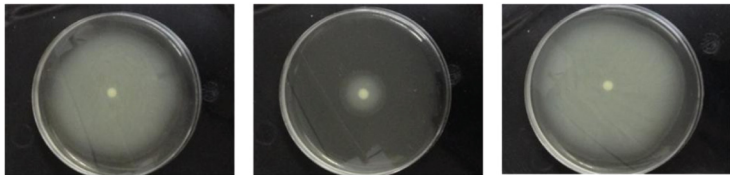

WT

 $\Delta stdA$ 

Complemented

**B**

Distance Migrated (mm)

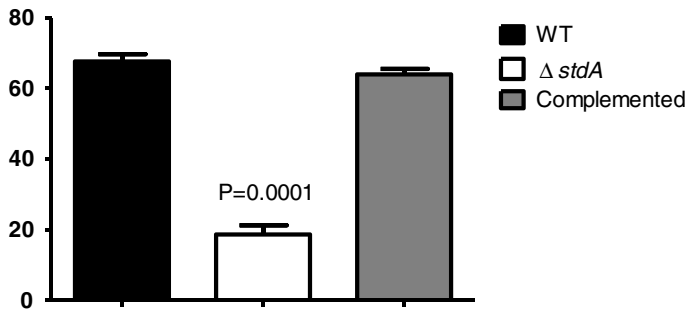

Supplement: MOESM2 [file 9665596]
